# Supplementary material for: Enhanced charge storage of Li3FeF6with carbon nanotubes for lithium-ion batteries
Source: Royal Society of Chemistry journal article supplement (doi:10.1039/c6ra23941b), 2016-01-01
Supplement: c6ra23941b1.pdf [file c6ra23941b1.pdf]

The supporting information

**Enhanced Charge Storage of  $\text{Li}_3\text{FeF}_6$  with Carbon Nanotubes for  
Lithium-Ion Batteries**

Yueli Shi<sup>a,b</sup>, Shubin Sun<sup>a</sup>, Jingjing Liu<sup>a</sup>, Yongli Cui<sup>a</sup>, Quanchao Zhuang<sup>a\*</sup>, Xiaobo  
Chen<sup>b\*</sup>

<sup>a</sup> *Lithium-ion Batteries Laboratory, School of Materials Science and Engineering, China University of Mining and Technology*

<sup>b</sup> *Department of Chemistry, University of Missouri – Kansas City (UMKC) Kansas*

*City, MO 64110, USA*

Fig. S1-S8

Table. S1-S3

---

*To whom correspondence should be addressed.*

<sup>a</sup> *Lithium-ion Batteries Laboratory, School of Materials Science and Engineering, China University of Mining and technology, Xuzhou  
221116, China. Quanchao Zhuang, Tel: +8613605215324, E-mail: zhuangquanchao@126.com, Fax: +86 516 83591870*

<sup>b</sup> *Department of Chemistry, University of Missouri – Kansas City (UMKC) Kansas City, MO 64110, USA. Xiaobo Chen, Tel: 816-235-6420, E-  
mail: Email: chenxiaobo@umkc.edu.*

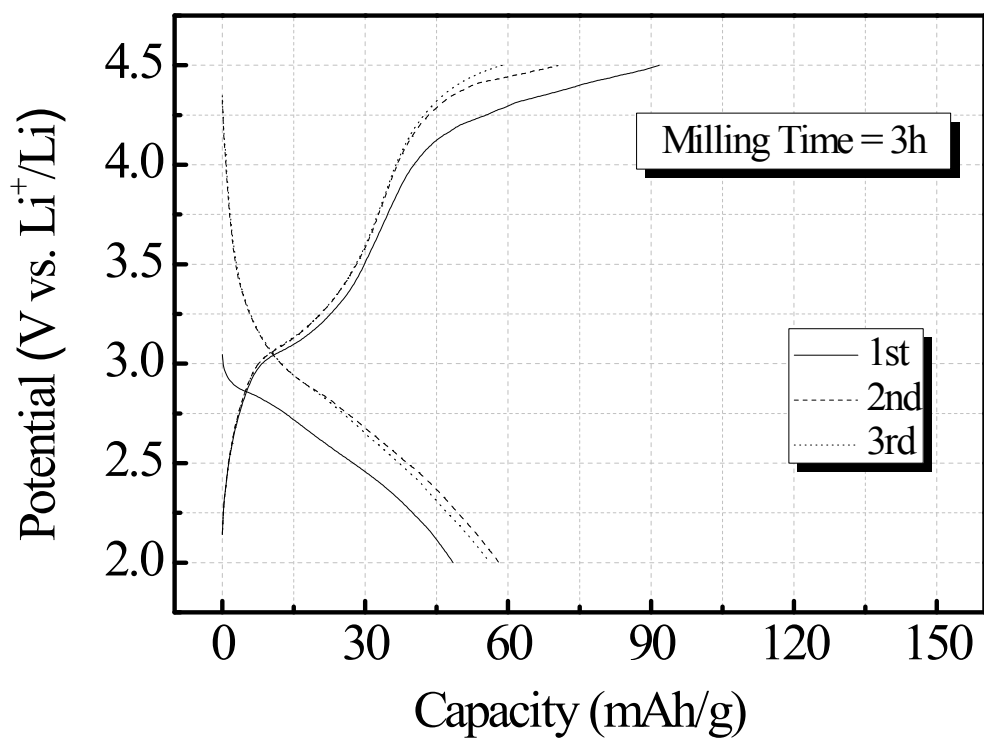

Fig. S1. Charge-discharge profiles of  $\text{Li}_3\text{FeF}_6/\text{C}$  cathode obtained by milling for 3 h at the current density of  $14 \text{ mA g}^{-1}$  under the potential range of 4.5~2.0 V

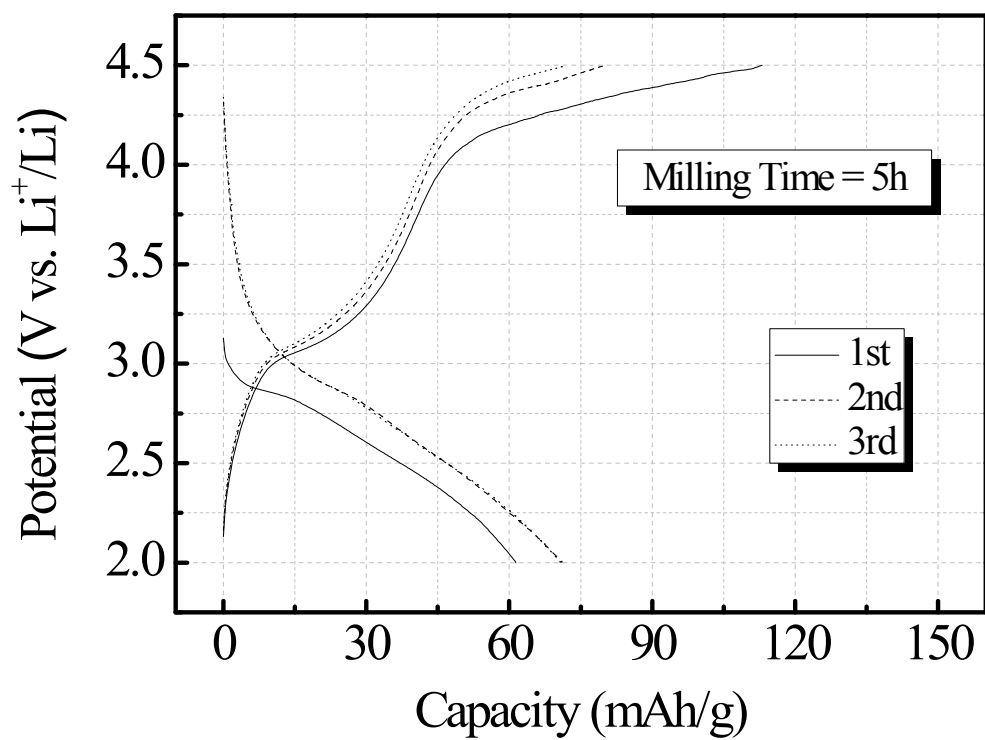

Fig. S2. Charge-discharge profiles of  $\text{Li}_3\text{FeF}_6/\text{C}$  cathode obtained by milling for 5 h at the current density of  $14 \text{ mA g}^{-1}$  under the potential range of 4.5~2.0 V

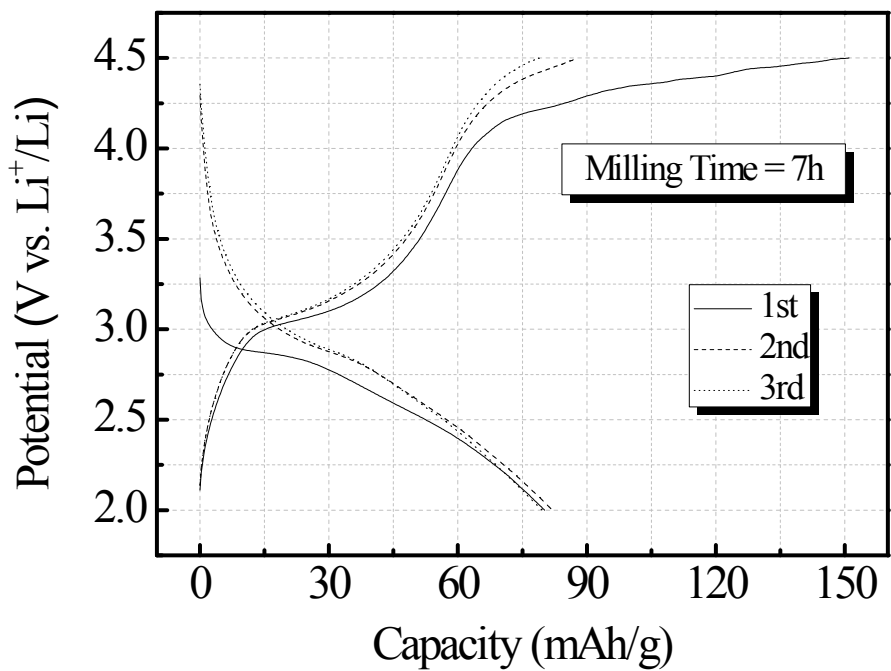

Fig. S3. Charge-discharge profiles of Li<sub>3</sub>FeF<sub>6</sub>/C cathode obtained by milling for 7 h at the current density of 14 mA g<sup>-1</sup> under the potential range of 4.5~2.0 V

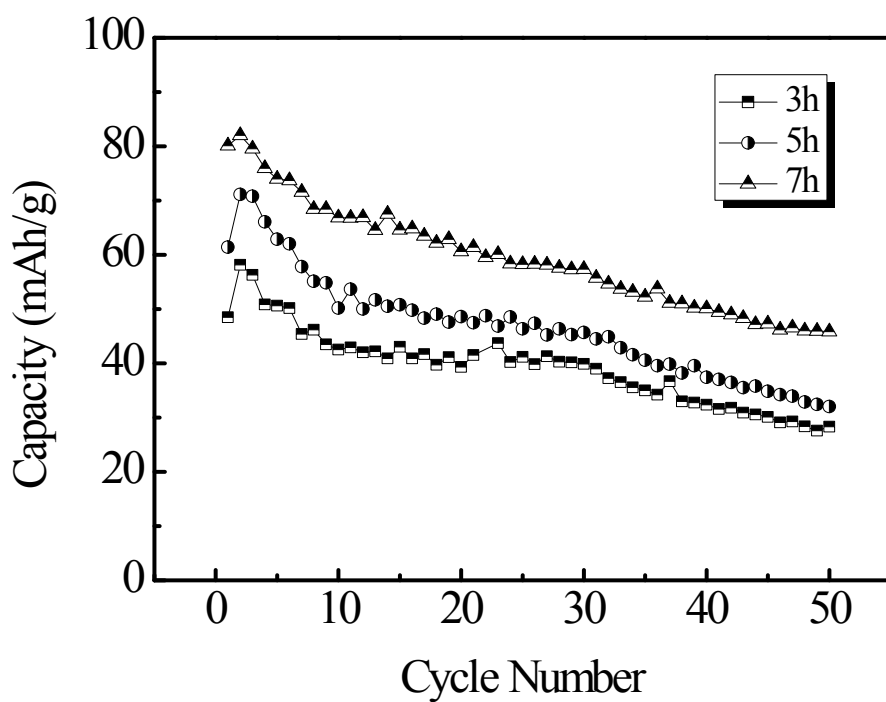

**Fig. S4.** The capacity-cycle profiles of  $\text{Li}_3\text{FeF}_6/\text{C}$  cathode obtained by milling at different times for 3 h, 5 h and 7 h, at the current density of  $14 \text{ mA g}^{-1}$  under the potential range of 4.5~2.0 V

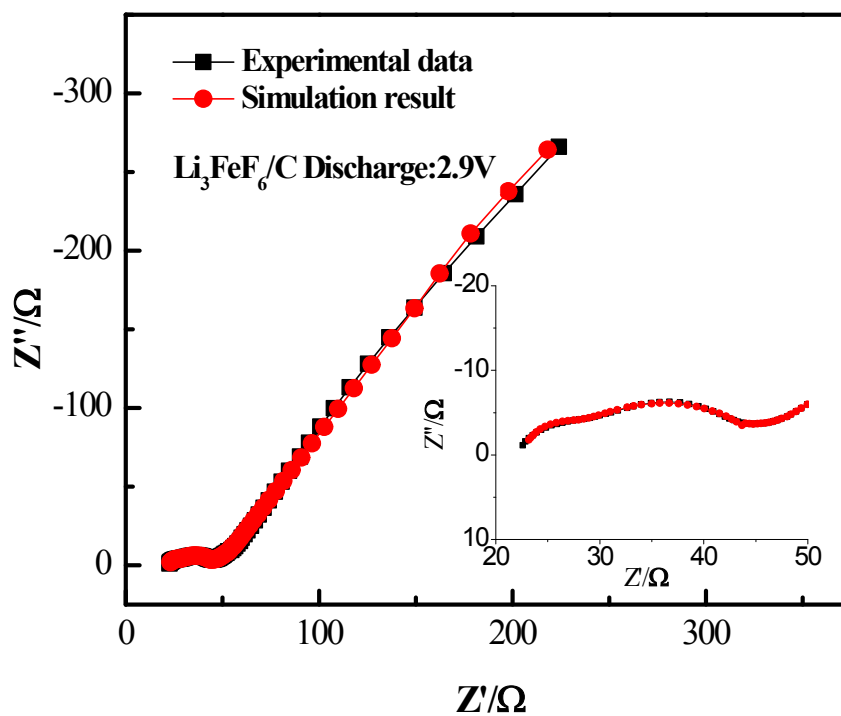

**Fig. S5.** Comparisons of EIS of  $\text{Li}_3\text{FeF}_6/\text{C}$  cathode experimental data recorded at 2.9 V during discharge process with the simulation result obtained from the proposed equivalent circuit

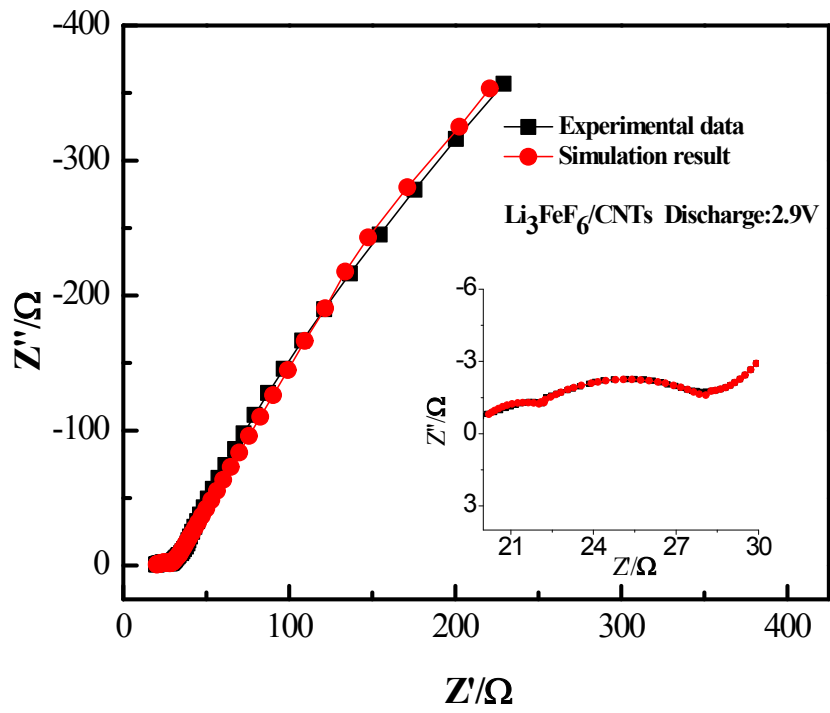

**Fig. S6.** Comparisons of EIS of  $\text{Li}_3\text{FeF}_6/\text{CNTs}$  cathode experimental data recorded at 2.9 V during discharge process with the simulation result obtained from the proposed equivalent circuit

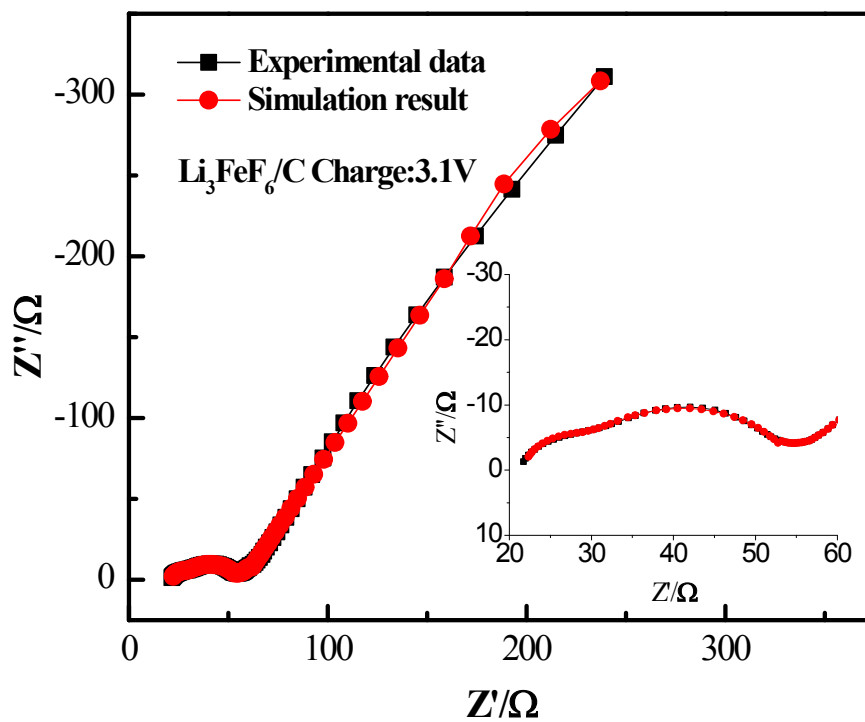

**Fig. S7.** Comparisons of EIS of  $\text{Li}_3\text{FeF}_6/\text{C}$  cathode experimental data recorded at 3.1 V during charge process with the simulation result obtained from the proposed equivalent circuit



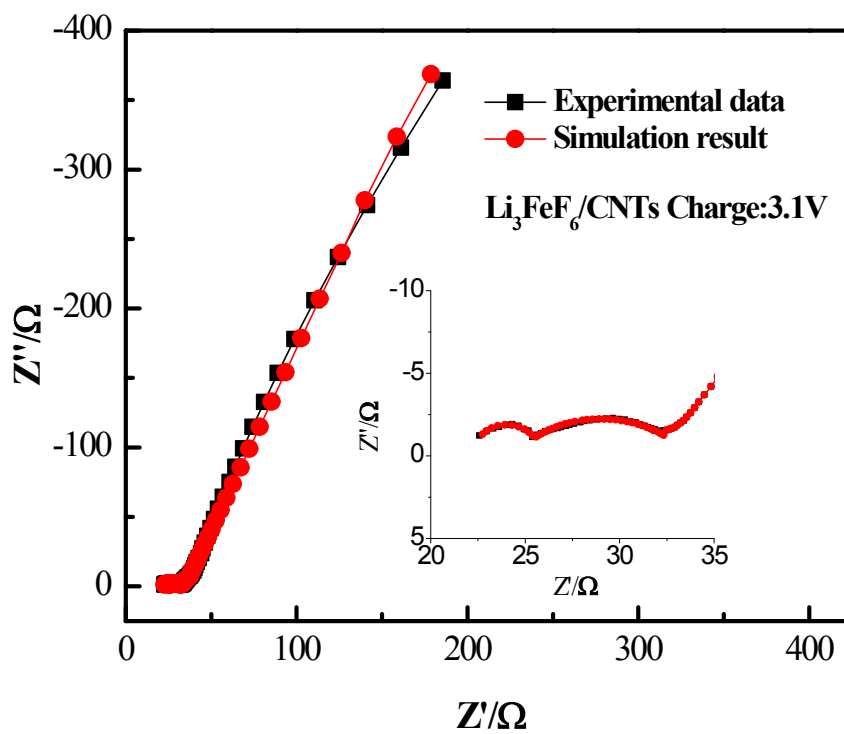

**Fig. S8.** Comparisons of EIS of Li<sub>3</sub>FeF<sub>6</sub>/CNTs cathode experimental data recorded at 3.1 V during charge process with the simulation result obtained from the proposed equivalent circuit

**Table S1**

The comparison of the LIBs performance in the manuscript with related research.

| Reporter                | Electrode composition (wt%)                                    | Current (mA g <sup>-1</sup> ) | Maximum capacity (mA h g <sup>-1</sup> ) | Cycles | Capacity retention (%) |
|-------------------------|----------------------------------------------------------------|-------------------------------|------------------------------------------|--------|------------------------|
| The manuscript          | Li <sub>3</sub> FeF <sub>6</sub> : 84<br>CNTs: 1<br>Binder: 15 | 14(C/10)                      | 120                                      | 50     | 83                     |
| G. Lieser <i>et al.</i> | Li <sub>3</sub> FeF <sub>6</sub> : 72<br>C: 25<br>binder: 3    | 7(C/20)                       | 128                                      | 100    | 47                     |
| A. Basa <i>et al.</i>   | Li <sub>3</sub> FeF <sub>6</sub> : 72<br>C: 25<br>binder: 3    | 7.8(C/18)                     | 140                                      | 30     | 85                     |

**Table S2**

Equivalent circuit parameters of  $\text{Li}_3\text{FeF}_6/\text{C}$  and  $\text{Li}_3\text{FeF}_6/\text{CNTs}$  cathode at 2.9 V in the discharge process .

| parameters         | $\text{Li}_3\text{FeF}_6/\text{C}$ |                 | $\text{Li}_3\text{FeF}_6/\text{CNTs}$ |                 |
|--------------------|------------------------------------|-----------------|---------------------------------------|-----------------|
|                    | value                              | Uncertainty (%) | value                                 | Uncertainty (%) |
| $R_s (\Omega)$     | 22.54                              | 0.32164         | 19.61                                 | 0.76145         |
| $R_{SEI} (\Omega)$ | 3.939                              | 10.318          | 3.9                                   | 10.099          |
| $Q_{SEI} - n$      | $1.4478 \times 10^{-6}$            | 14.629          | $4.8253 \times 10^{-5}$               | 14.315          |
| $Q_{SEI} - Y_0$    | 1.032                              | 3.5135          | 0.059305                              | 7.9561          |
| $R_{ct}(\Omega)$   | 20.12                              | 2.9232          | 9.205                                 | 2.2128          |
| $Q_{ct} - n$       | $1.6137 \times 10^{-4}$            | 9.1194          | $8.1569 \times 10^{-4}$               | 9.1795          |
| $Q_{ct} - Y_0$     | 0.68284                            | 2.2607          | 0.57871                               | 2.1588          |
| $R_D (\Omega)$     | 1398                               | 5.5611          | 1657                                  | 2.8228          |
| $Q_D - n$          | 158                                | 9.0924          | 108.2                                 | 4.5205          |
| $Q_D - Y_0$        | 0.64799                            | 0.32931         | 0.71588                               | 0.45348         |

**Table S3**

Equivalent circuit parameters of  $\text{Li}_3\text{FeF}_6/\text{C}$  and  $\text{Li}_3\text{FeF}_6/\text{CNTs}$  cathode at 3.1 V in the charge process .

| parameters         | $\text{Li}_3\text{FeF}_6/\text{C}$ |                 | $\text{Li}_3\text{FeF}_6/\text{CNTs}$ |                 |
|--------------------|------------------------------------|-----------------|---------------------------------------|-----------------|
|                    | value                              | Uncertainty (%) | value                                 | Uncertainty (%) |
| $R_s (\Omega)$     | 21.7                               | 0.39569         | 22.33                                 | 0.34665         |
| $R_{SEI} (\Omega)$ | 6.574                              | 6.9597          | 3.434                                 | 3.6034          |
| $Q_{SEI} - n$      | $2.2386 \times 10^{-6}$            | 14.922          | $6.2463 \times 10^{-7}$               | 14.669          |
| $Q_{SEI} - Y_0$    | 0.97191                            | 2.6469          | 1.058                                 | 2.3672          |
| $R_{ct} (\Omega)$  | 27.05                              | 2.1553          | 9.324                                 | 2.3292          |
| $Q_{ct} - n$       | $7.2796 \times 10^{-5}$            | 6.8645          | $7.5269 \times 10^{-4}$               | 10.282          |
| $Q_{ct} - Y_0$     | 0.75932                            | 1.5485          | 0.57374                               | 2.3307          |
| $R_D (\Omega)$     | 1572                               | 2.6303          | 2844                                  | 7.9058          |
| $Q_D - n$          | 138.4                              | 4.1897          | 204.9                                 | 10.603          |
| $Q_D - Y_0$        | 0.6839                             | 0.25071         | 0.7681                                | 0.35093         |

## References

- 1 G. Lieser, M. Schroeder, H. Geßwein, V. Winkler, S. Glatthaar, M. Yavuz, R. Binder, *J. Sol-Gel Sci Technol*, 2014, **71**, 50–59.
- 2 A. Basa, E. Gonzalo, A. Kuhn, F. Alvarado, *J. Power Sources*, 2012, **197**, 260–266.
